# Supplementary material for: Professional Learning and Development of Postdoctoral Scholars: A Systematic Review of the Literature
Source: Hindawi journal article supplement (doi:10.1155/2018/5950739), 2018-12-02
Supplement: f1 [file 5950739.f1.docx]

**Table S1**

*Quality appraisal scores for included qualitative studies*

| **Study** | **1. Congruity between philosophical perspective and research methodology** | **2. Congruity between research methodology and research objectives** | **3. Congruity between research methodology and data collection methods** | **4. Congruity between research methodology and data analysis** | **5. Congruity between research methodology and interpretation of results** | **6. Statement locating the researcher culturally or theoretically** | **7. Researcher reflexivity addressed** | **8. Participants, and their voices, adequately represented** | **9.** **Evidence of ethical approval by an appropriate body** | **10. Conclusions flow from the analysis, or interpretation, of the data** |
| --- | --- | --- | --- | --- | --- | --- | --- | --- | --- | --- |
| Åkerlind (2005) | U | Y | Y | Y | Y | N | N | Y | U | Y |
| Ash et al. (2009) | U | Y | Y | Y | Y | Y | U | Y | U | Y |
| Bauer et al. (2013)* | U | U | Y | N | N | N | N | Y | U | Y |
| Chen et al. (2015) | U | Y | Y | Y | Y | Y | N | Y | U | Y |
| Ebert-May et al. (2015)* | U | Y | N | N | N | N | N | N | U | N |
| Eisen and Eaton (2017)* | U | Y | Y | Y | Y | N | N | Y | Y | Y |
| Holtzclaw et al. (2005)* | U | Y | Y | N | N | N | N | N | U | Y |
| Keen-Rhinehart et al. (2009)* | N | Y | Y | U | U | N | N | Y | U | U |
| McAlpine et al. (2017) | U | U | U | U | U | Y | Y | N | U | U |
| McCullough (2010)* | Y | Y | Y | Y | Y | Y | U | Y | Y | Y |
| Phillips (2010) | U | Y | Y | U | U | N | N | N | U | Y |
| Reid Ponte (2015)* | U | U | U | U | U | N | N | N | U | U |
| Rybarczyk et al. (2016)* | U | Y | Y | Y | Y | N | N | Y | U | Y |

*Note:* *indicates mixed methods study; Y=Yes, the criteria have been established through the report description or have been confirmed with the primary author; N=No, the criteria have not been applied appropriately; U= Unclear, the criteria are not clearly identified in the report and it was not possible to gain clarification from the primary author

**Table S2**

*Quality appraisal scores for included quantitative studies*

| **Study** | **1. Study based on a random or pseudo- random sample** | **2.** **Criteria for inclusion are clearly defined** | **3. Confounding factors and strategies to deal with them are stated** | **4. Outcomes are assessed using objective criteria** | **5. If comparisons were made there is sufficient description of the groups** | **6. Follow up was carried out over a sufficient time period** | **7. Outcomes of people who withdrew described and included in the analysis** | **8. Outcomes measured in a reliable way** | **9. Appropriate statistical analysis used** | **10. Evidence of ethical approval by an appropriate body** |
| --- | --- | --- | --- | --- | --- | --- | --- | --- | --- | --- |
| Baiduc et al. (2016) | N | Y | N | Y | N/A | N/A | N/A | Y | Y | U |
| Bauer et al. (2013)* | N | N | N | U | N/A | Y | N/A | U | U | U |
| Bessudnov et al. (2015) | N | Y | N | Y | Y | N/A | N/A | Y | Y | U |
| Brancaccio-Taras et al. (2016) | N | Y | N | N | N/A | N/A | N/A | U | Y | U |
| Chang et al. (2008) | N | N | N | N | N/A | N/A | N/A | U | Y | U |
| Cox et al. (2011) | N | Y | N | N | N/A | N/A | N/A | Y | Y | U |
| Derting et al. (2016) | N | Y | Y | U | Y | N/A | N/A | Y | Y | U |
| Ebert-May et al. (2015)* | N | Y | N | N | N/A | N/A | N/A | Y | Y | U |
| Eisen and Eaton (2017)* | N | N | N | Y | N | Y | N/A | Y | Y | Y |
| Gerdeman et al. (2007) | N | Y | N | N | N/A | N/A | N/A | U | U | U |
| Gianaros (2006) | N | N | N | N | N/A | Y | N/A | U | Y | U |
| Hobin et al. (2014) | N | Y | N | N | N/A | N/A | N/A | Y | Y | Y |
| Holtzclaw et al. (2005)* | N | N | N | N | N | N/A | N/A | U | U | U |
| Jadavji et al. (2016) | N | Y | Y | Y | N/A | N/A | N/A | Y | U | U |
| Keen-Rhinehart et al. (2009)* | N | N | N | Y | N/A | N/A | N/A | U | U | U |
| Kuhn and Castano (2016) | N | U | N | N | N/A | N/A | N/A | U | U | U |
| Lee et al. (2010) | N | Y | N | N | N/A | N/A | N/A | Y | Y | Y |
| Matyas et al. (2011) | N | U | N | Y | Y | N/A | N/A | Y | Y | U |
| McCullough (2010)* | N | Y | N | N | N/A | N/A | N/A | Y | Y | Y |
| Mitchell et al. (2013) | N | Y | N | Y | N/A | N/A | N/A | Y | Y | U |
| Reid Ponte (2015)* | N | N | N | Y | N/A | N/A | N/A | U | U | U |
| Rybarczyk et al. (2016)* | N | Y | N | Y | Y | Y | U | Y | Y | U |
| Rybarczyk et al. (2011) | N | Y | N | Y | Y | N/A | N/A | Y | Y | U |

*Note:* *indicates mixed methods study; Y=Yes, the criteria have been established through the report description or have been confirmed with the primary author; N=No, the criteria have not been applied appropriately; U= Unclear, the criteria are not clearly identified in the report and it was not possible to gain clarification from the primary author: N/A= Not applicable, the criteria are not applicable to the study methodology
